# Supplementary material
Source: PubMed Central journal article supplement (PMC5315477)
Supplement: ismej2016114x10.pdf [file ismej2016114x10.pdf]

**Table S2. Bacterial community composition across intestinal compartments (feces, cecum, and ileum) at the family level.**

| feces           |                     |                               | relative abundance (%) |           |            |                  |                  |  |
|-----------------|---------------------|-------------------------------|------------------------|-----------|------------|------------------|------------------|--|
| phylum          | class               | family                        | WT                     | v-IL-15tg | logFC      | PValue           | FDR              |  |
| Actinobacteria  | Actinobacteria      | <i>Bifidobacteriaceae</i>     | 0.73                   | 0.33      | 0.7921911  | 0.2858           | 0.3036           |  |
| Bacteroidetes   | Bacteroidia         | <i>Bacteroidaceae</i>         | 2.00                   | 6.85      | -1.7379271 | <b>0.0049</b>    | <b>0.0141</b>    |  |
|                 |                     | <i>Prevotellaceae</i>         | 0.58                   | 1.21      | -1.3098976 | 0.0517           | 0.0732           |  |
|                 |                     | <i>Rikenellaceae</i>          | 3.37                   | 2.08      | 1.6591556  | <b>0.0050</b>    | <b>0.0141</b>    |  |
|                 |                     | <i>S24-7</i>                  | 62.11                  | 46.17     | 0.8518989  | 0.1133           | 0.1482           |  |
|                 |                     | [ <i>Odoribacteraceae</i> ]   | 0.97                   | 0.47      | 2.4851926  | <b>0.0045</b>    | <b>0.0141</b>    |  |
|                 |                     | [ <i>Paraprevotellaceae</i> ] | 6.79                   | 7.74      | 0.6487954  | 0.2160           | 0.2448           |  |
|                 |                     | fam. not assigned             | 0.64                   | 3.07      | -2.8777891 | <b>7.527E-07</b> | <b>6.398E-06</b> |  |
| Firmicutes      | Bacilli             | <i>Lactobacillaceae</i>       | 4.94                   | 7.33      | -0.9008724 | 0.1455           | 0.1766           |  |
|                 |                     | <i>Turicibacteraceae</i>      | 0.48                   | 0.00      | 3.1163517  | <b>0.0045</b>    | <b>0.0141</b>    |  |
|                 | Clostridia          | <i>Clostridiaceae</i>         | 0.96                   | 0.20      | 1.7926073  | <b>0.0376</b>    | 0.0581           |  |
|                 |                     | <i>Lachnospiraceae</i>        | 1.64                   | 2.66      | -1.4578893 | <b>0.0229</b>    | 0.0534           |  |
|                 |                     | <i>Ruminococcaceae</i>        | 2.44                   | 1.56      | 1.4318648  | <b>0.0260</b>    | 0.0534           |  |
|                 |                     | fam. not assigned             | 8.64                   | 6.48      | 1.2569871  | <b>0.0282</b>    | 0.0534           |  |
|                 | Erysipelotrichi     | <i>Erysipelotrichaceae</i>    | 1.07                   | 2.63      | -1.6506351 | <b>0.0355</b>    | 0.0581           |  |
| Proteobacteria  | Deltaproteobacteria | <i>Desulfovibrionaceae</i>    | 0.29                   | 0.62      | -0.925956  | <b>0.4557</b>    | <b>0.4557</b>    |  |
| Verrucomicrobia | Verrucomicrobiae    | <i>Verrucomicrobiaceae</i>    | 0.24                   | 7.91      | -4.7844848 | <b>2.444E-10</b> | <b>4.156E-09</b> |  |
| cecum           |                     |                               | relative abundance (%) |           |            |                  |                  |  |
| phylum          | class               | family                        | WT                     | v-IL-15tg | logFC      | PValue           | FDR              |  |
| Bacteroidetes   | Bacteroidia         | <i>Bacteroidaceae</i>         | 1.36                   | 3.99      | -1.6809302 | <b>0.0029</b>    | <b>0.0093</b>    |  |
|                 |                     | <i>Prevotellaceae</i>         | 0.37                   | 0.59      | -1.7630516 | <b>0.0356</b>    | 0.0713           |  |
|                 |                     | <i>Rikenellaceae</i>          | 4.54                   | 3.48      | 1.2812665  | <b>0.0059</b>    | <b>0.0156</b>    |  |
|                 |                     | <i>S24-7</i>                  | 40.22                  | 36.58     | 0.2994091  | 0.5620           | 0.5620           |  |
|                 |                     | [ <i>Odoribacteraceae</i> ]   | 2.36                   | 0.35      | 3.2840747  | <b>0.0005</b>    | <b>0.0026</b>    |  |
|                 |                     | [ <i>Paraprevotellaceae</i> ] | 4.72                   | 4.44      | 0.6222448  | 0.2784           | 0.3897           |  |
|                 |                     | fam. not assigned             | 0.45                   | 2.27      | -2.4275481 | <b>0.0017</b>    | <b>0.0069</b>    |  |
| Deferribacteres | Deferribacteres     | <i>Deferribacteraceae</i>     | 1.07                   | 0.66      | 0.7436959  | 0.4766           | 0.5600           |  |
| Firmicutes      | Bacilli             | <i>Lactobacillaceae</i>       | 1.22                   | 4.32      | -1.6012775 | <b>0.0068</b>    | <b>0.0156</b>    |  |
|                 | Clostridia          | <i>Clostridiaceae</i>         | 0.26                   | 0.37      | -0.4145128 | 0.5356           | 0.5620           |  |
|                 |                     | <i>Lachnospiraceae</i>        | 3.84                   | 7.88      | -0.6772985 | 0.2165           | 0.3463           |  |
|                 |                     | <i>Ruminococcaceae</i>        | 9.16                   | 4.81      | 1.6047906  | <b>0.0004</b>    | <b>0.0026</b>    |  |
|                 |                     | fam. not assigned             | 25.63                  | 21.62     | 0.7383458  | <b>0.0408</b>    | 0.0725           |  |
| Proteobacteria  | Deltaproteobacteria | <i>Desulfovibrionaceae</i>    | 2.26                   | 1.95      | 0.4520553  | 0.4900           | 0.5600           |  |
| Tenericutes     | Mollicutes          | <i>Anaeroplasmataceae</i>     | 0.52                   | 1.12      | -0.8408389 | 0.2922           | 0.3897           |  |
| Verrucomicrobia | Verrucomicrobiae    | <i>Verrucomicrobiaceae</i>    | 0.10                   | 2.95      | -3.0706332 | <b>0.0001</b>    | <b>0.0024</b>    |  |
| ileum           |                     |                               | relative abundance (%) |           |            |                  |                  |  |
| phylum          | class               | family                        | WT                     | v-IL-15tg | logFC      | PValue           | FDR              |  |
| Actinobacteria  | Actinobacteria      | <i>Bifidobacteriaceae</i>     | 1.55                   | 0.22      | 2.1434885  | 0.0535           | 0.1300           |  |
|                 | Coriobacteriia      | <i>Coriobacteriaceae</i>      | 0.09                   | 0.40      | -0.8523897 | 0.3187           | 0.4341           |  |
| Bacteroidetes   | Bacteroidia         | <i>Bacteroidaceae</i>         | 0.01                   | 0.29      | -0.9015356 | 0.3905           | 0.4426           |  |
|                 |                     | <i>S24-7</i>                  | 2.48                   | 13.61     | -2.8896138 | <b>0.0104</b>    | <b>0.0353</b>    |  |
|                 |                     | [ <i>Odoribacteraceae</i> ]   | 0.07                   | 0.16      | 0.207351   | 0.8683           | 0.9175           |  |
|                 |                     | [ <i>Paraprevotellaceae</i> ] | 0.04                   | 1.11      | -1.3981053 | 0.1143           | 0.2429           |  |
|                 |                     | fam. not assigned             | 0.00                   | 0.45      | -1.2057727 | 0.1713           | 0.3175           |  |
| Firmicutes      | Bacilli             | <i>Lactobacillaceae</i>       | 20.84                  | 43.40     | -1.3101401 | 0.1867           | 0.3175           |  |
|                 |                     | <i>Streptococcaceae</i>       | 1.55                   | 0.04      | 3.3815733  | <b>0.0002</b>    | <b>0.0014</b>    |  |
|                 | Clostridia          | <i>Clostridiaceae</i>         | 65.27                  | 23.02     | 1.0872175  | 0.3575           | 0.4341           |  |
|                 |                     | <i>Lachnospiraceae</i>        | 0.24                   | 0.97      | -0.8238579 | 0.3486           | 0.4341           |  |
|                 |                     | <i>Ruminococcaceae</i>        | 0.86                   | 0.59      | 2.7586418  | <b>0.0140</b>    | <b>0.0396</b>    |  |
|                 |                     | fam. not assigned             | 0.86                   | 6.44      | -3.222775  | <b>0.0086</b>    | <b>0.0353</b>    |  |
|                 | Erysipelotrichi     | <i>Erysipelotrichaceae</i>    | 4.55                   | 3.72      | 0.141341   | 0.9175           | 0.9175           |  |
| Proteobacteria  | Deltaproteobacteria | <i>Desulfovibrionaceae</i>    | 0.40                   | 0.98      | -0.9947364 | 0.3327           | 0.4341           |  |
| Tenericutes     | Mollicutes          | <i>Mycoplasmataceae</i>       | 0.00                   | 0.68      | -2.8517619 | <b>0.0099</b>    | <b>0.0353</b>    |  |
| Verrucomicrobia | Verrucomicrobiae    | <i>Verrucomicrobiaceae</i>    | 0.00                   | 2.09      | -4.0655816 | <b>0.0002</b>    | <b>0.0014</b>    |  |
