# Supplementary material
Source: PubMed Central journal article supplement (PMC5315477)

**Fig. S1**

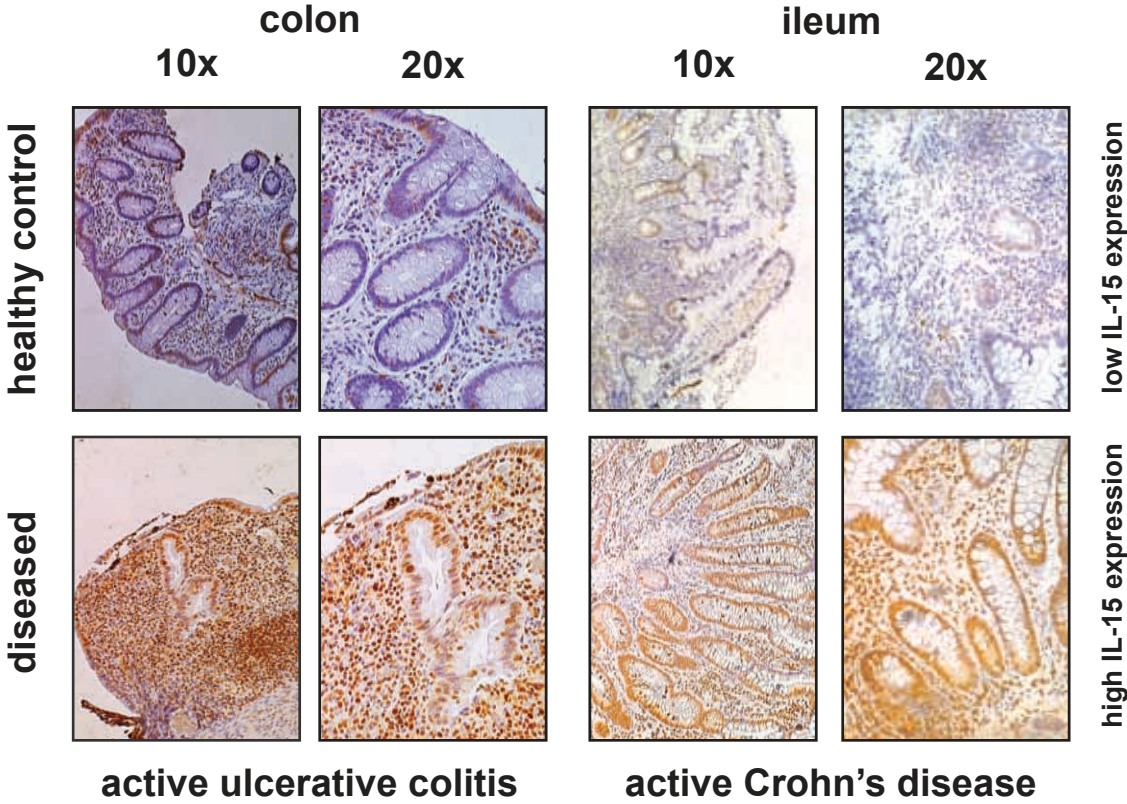

Supplement: ismej2016114x2.pdf [file ismej2016114x2.pdf]

**Fig. S2**

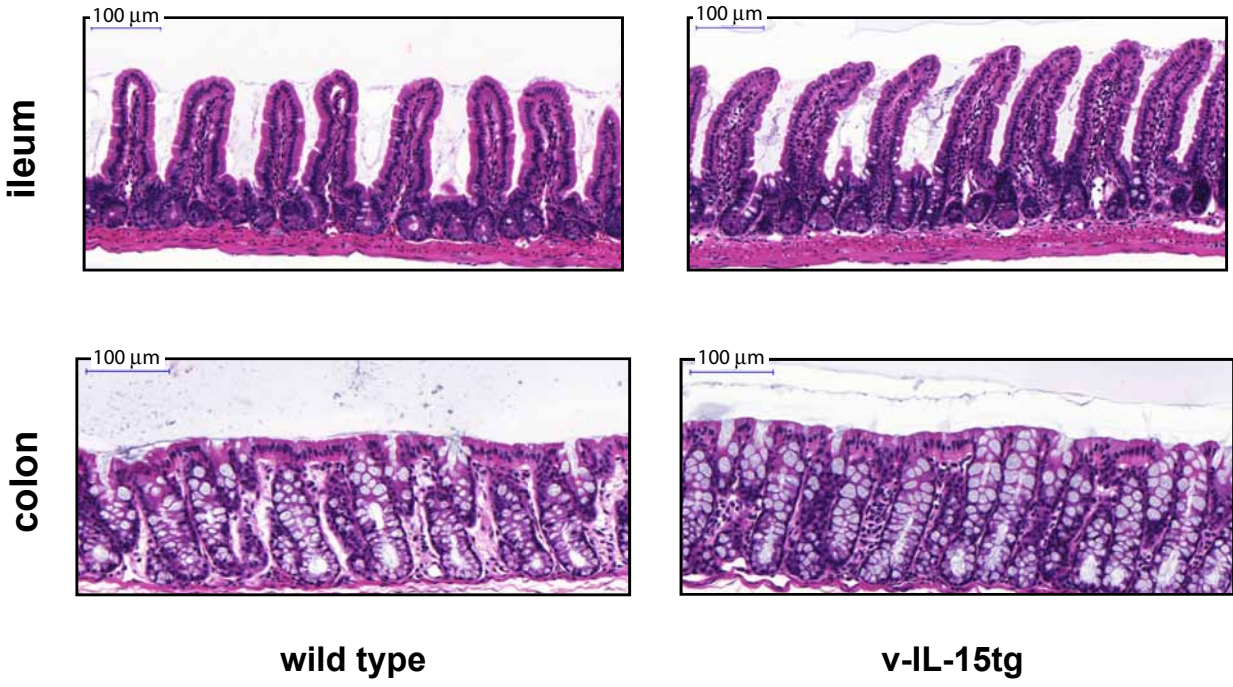

Supplement: ismej2016114x3.pdf [file ismej2016114x3.pdf]

**Fig. S3**

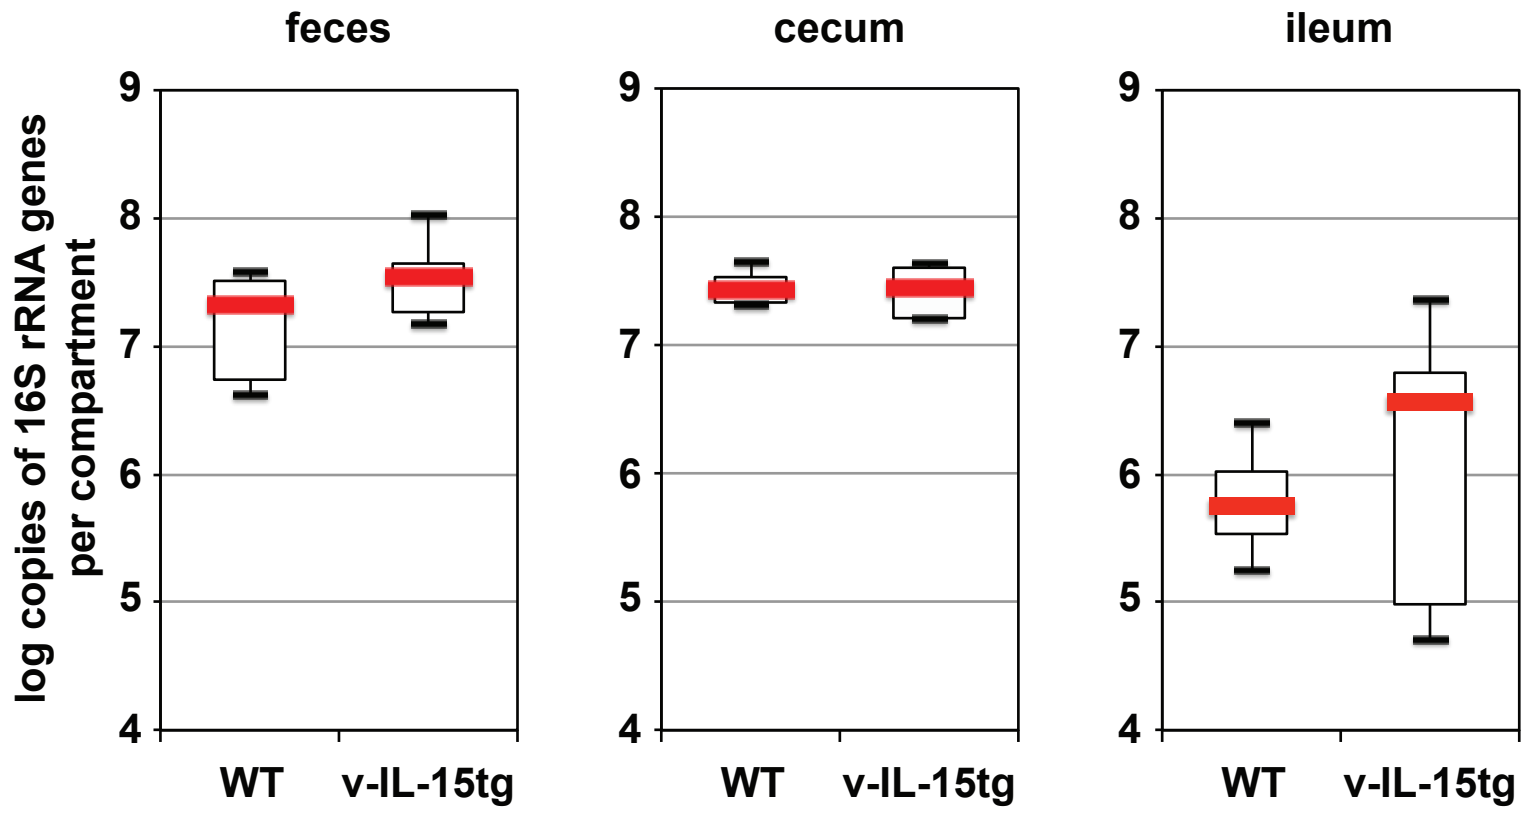

Supplement: ismej2016114x4.pdf [file ismej2016114x4.pdf]

# Fig. S4

**a**

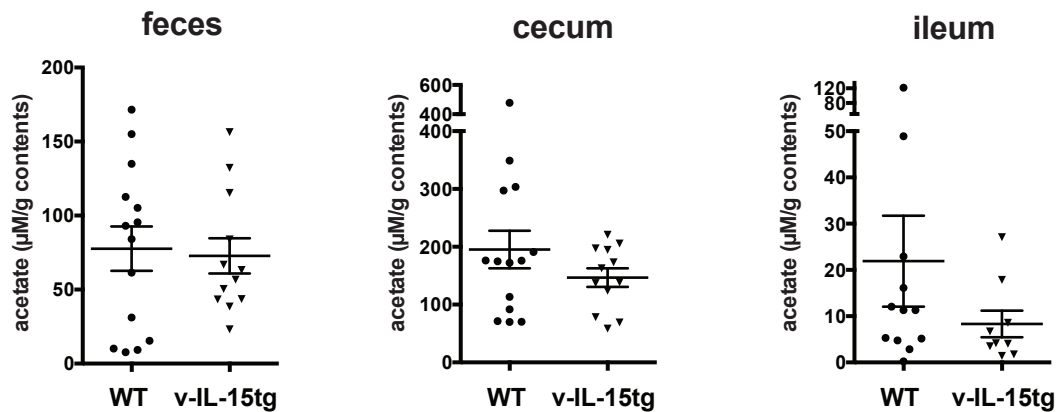

**b**

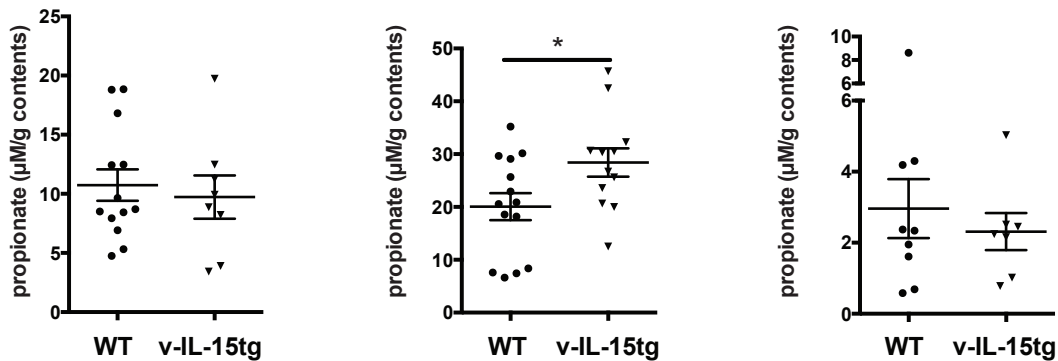

Supplement: ismej2016114x5.pdf [file ismej2016114x5.pdf]

**Fig. S5**

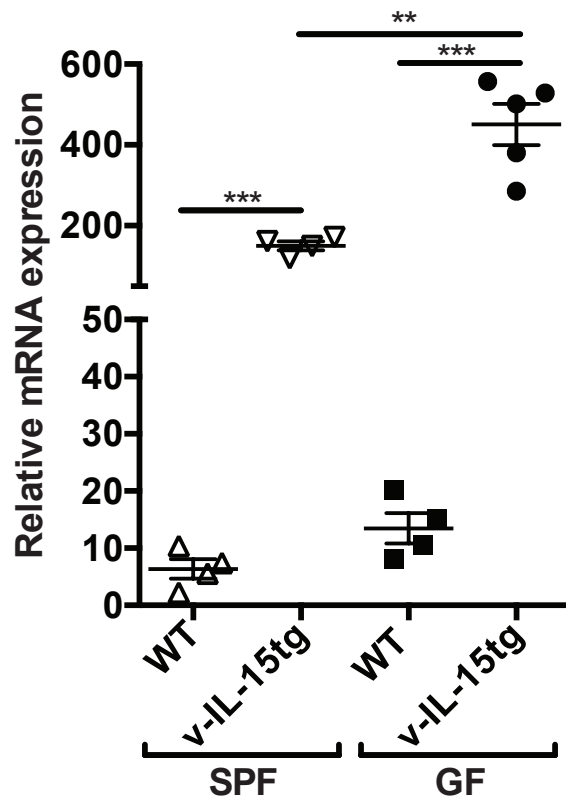

Supplement: ismej2016114x6.pdf [file ismej2016114x6.pdf]
